# Supplementary material for: Patterns of longer-term climate change effects on CO 2 efflux from biocrusted soils differ from those observed in the short term
Source: Copernicus journal article supplement (doi:10.5194/bg-15-4561-2018), 2018-07-26
Supplement: Supplementary file 1 [file bg-15-4561-2018-supplement.pdf]

Supplement of Biogeosciences, 15, 4561–4573, 2018  
<https://doi.org/10.5194/bg-15-4561-2018-supplement>  
© Author(s) 2018. This work is distributed under  
the Creative Commons Attribution 4.0 License.

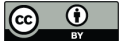

*Supplement of*

## **Patterns of longer-term climate change effects on CO<sub>2</sub> efflux from biocrusted soils differ from those observed in the short term**

**Anthony Darrouzet-Nardi et al.**

*Correspondence to:* Anthony Darrouzet-Nardi ([ajdarrouzetnardi@utep.edu](mailto:ajdarrouzetnardi@utep.edu))

The copyright of individual parts of the supplement might differ from the CC BY 4.0 License.

| Treatment | Comparison  | Seven-month periods          | Active photosynthesis periods |
|-----------|-------------|------------------------------|-------------------------------|
|           |             | $t_d$ (g C m <sup>-2</sup> ) | $t_d$ (g C m <sup>-2</sup> )  |
| control   | 2007 - 2006 | -3 [-16.2, 12.4]             | -6.5 [-8.7, -4.4]             |
| control   | 2013 - 2006 | 9.2 [-3.7, 19.9]             | -4.7 [-7.9, -1.6]             |
| control   | 2014 - 2006 | 36.2 [21.7, 52.9]            | 2.2 [-2, 6.3]                 |
| warmed    | 2007 - 2006 | -2 [-18.3, 13.1]             | -8.6 [-11.8, -5.3]            |
| warmed    | 2013 - 2006 | -6.6 [-19, 8.3]              | -7.4 [-12.5, -2.4]            |
| warmed    | 2014 - 2006 | 29.9 [8.6, 45.3]             | 1 [-2.1, 4.2]                 |
| watered   | 2007 - 2006 | -4.4 [-14.9, 5.2]            | -11.5 [-13.7, -9.4]           |
| watered   | 2013 - 2006 | -12.4 [-23.5, 2.8]           | -11.5 [-14.7, -8.2]           |
| watered   | 2014 - 2006 | 20.2 [9.9, 32.3]             | -3.9 [-6.9, -0.8]             |
| combined  | 2007 - 2006 | -6.7 [-21.6, 6.2]            | -10 [-12.1, -8]               |
| combined  | 2013 - 2006 | -20.8 [-36.2, -6.6]          | -9.7 [-12.8, -6.6]            |
| combined  | 2014 - 2006 | 17.6 [-1.2, 40.6]            | -2.4 [-3.8, -1]               |

Table S1. Differences in NSE between 2006 values and later years within each treatment with 95% confidence intervals. Analyses correspond to the NSE data shown in Fig. 4.

| Treatment   | Time period | Comparison         | $t_d$ (%)            |
|-------------|-------------|--------------------|----------------------|
| Light cyano | 2017 – 2005 | Warmed - Control   | 19.5 [-2.42, 41.4]   |
| Light cyano | 2017 – 2005 | Watered - Control  | 23.2 [-9.94, 56.4]   |
| Light cyano | 2017 – 2005 | Combined - Control | 40.5 [11.1, 70.0]    |
| Dark cyano  | 2017 – 2005 | Warmed - Control   | -1.50 [-11.0, 8.02]  |
| Dark cyano  | 2017 – 2005 | Watered - Control  | 5.93 [-6.42, 18.3]   |
| Dark cyano  | 2017 – 2005 | Combined - Control | -4.58 [-12.6, 3.46]  |
| Lichen      | 2017 – 2005 | Warmed - Control   | 4.82 [-1.57, 11.2]   |
| Lichen      | 2017 – 2005 | Watered - Control  | 1.77 [-11.2, 14.8]   |
| Lichen      | 2017 – 2005 | Combined - Control | 0.364 [-11.2, 11.9]  |
| Moss        | 2017 – 2005 | Warmed - Control   | -17.7 [-24.6, -10.7] |
| Moss        | 2017 – 2005 | Watered - Control  | -26.2 [-49.4, -2.99] |
| Moss        | 2017 – 2005 | Combined - Control | -27.3 [-46.2, -8.48] |

Table S2. Differences in cover (calculated as cover in 2017 minus cover in 2005) between treatments and controls with 95% confidence intervals for four biocrust constituents: light cyanobacteria, dark cyanobacteria, a mix of lichens (mostly *Collema spp.*) and moss (*Syntrichia caninervis*). Analyses correspond to the NSE data shown in Fig. 4.

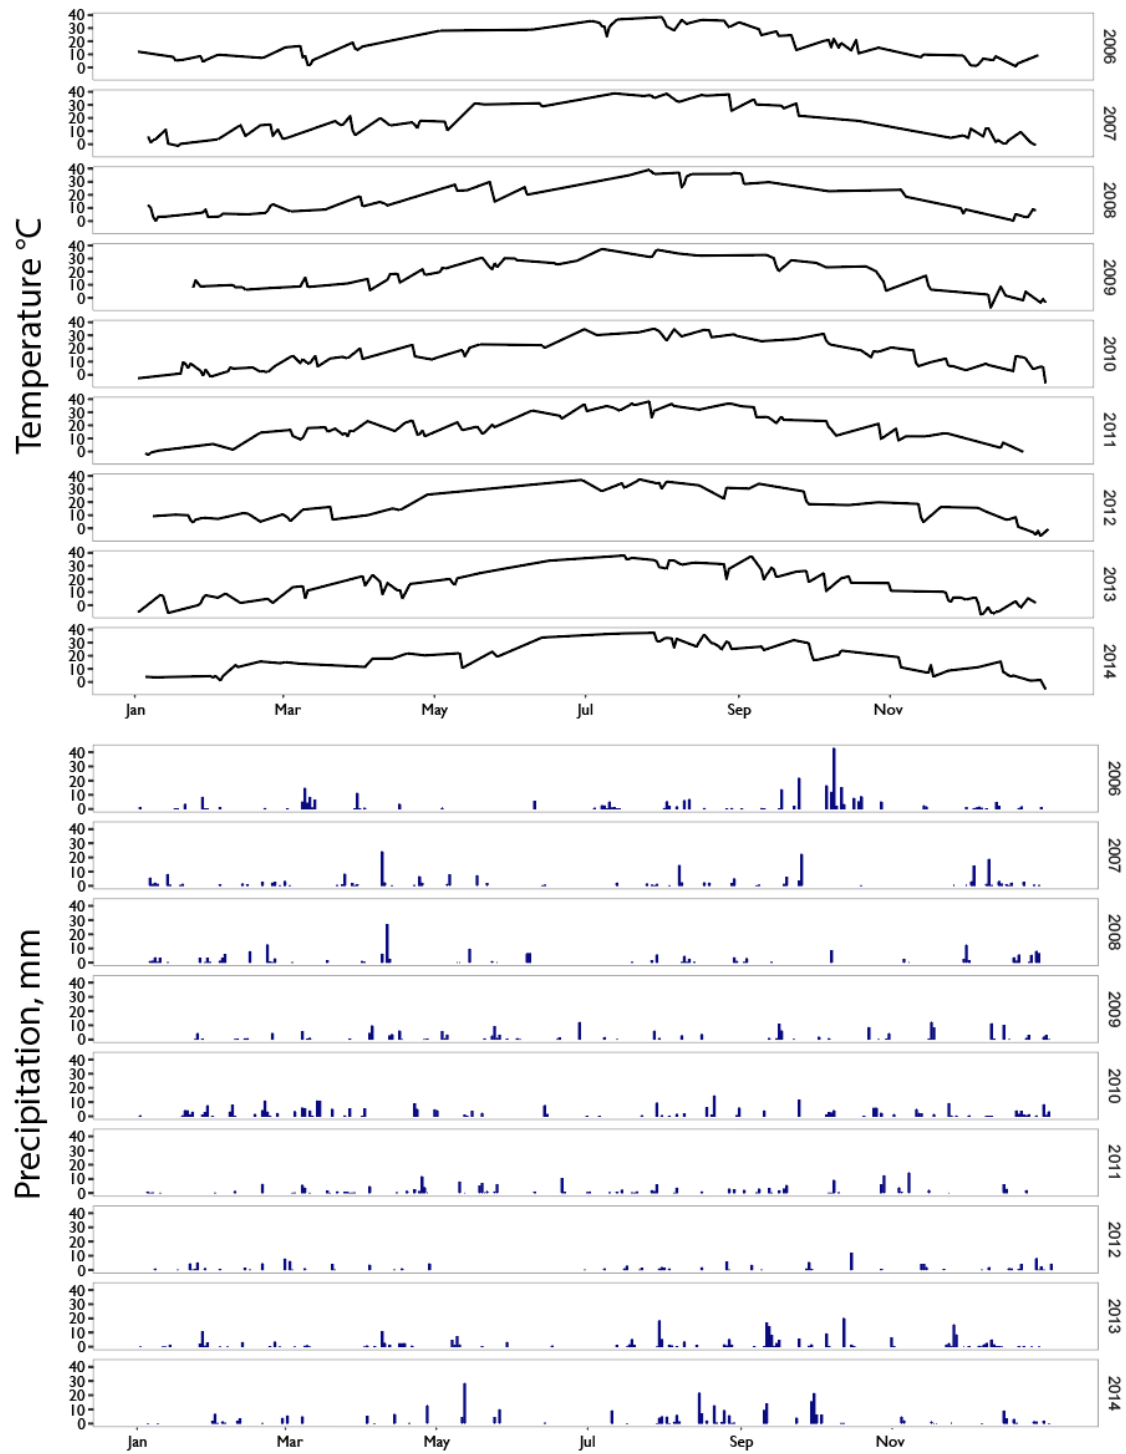

Fig. S1. Air temperature (daily maximum) and precipitation (24 hour rainfall totals) throughout the 9-year study period. Data are from instruments at our study site.

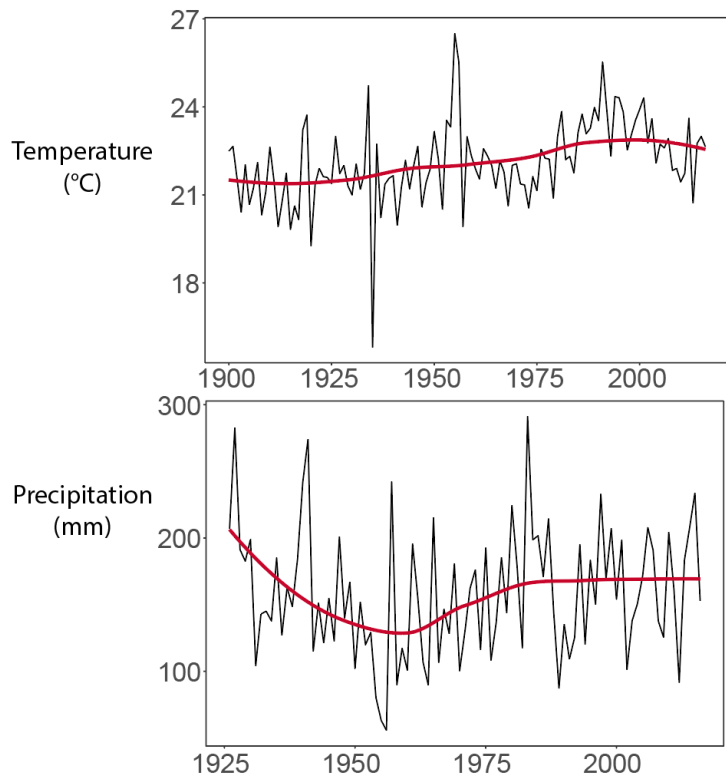

Fig. S2. Long-term climate records from a nearby weather station in Moab, UT. Reliable precipitation data from before 1925 data were not available. A loess smoother (red line) shows long-term trends.

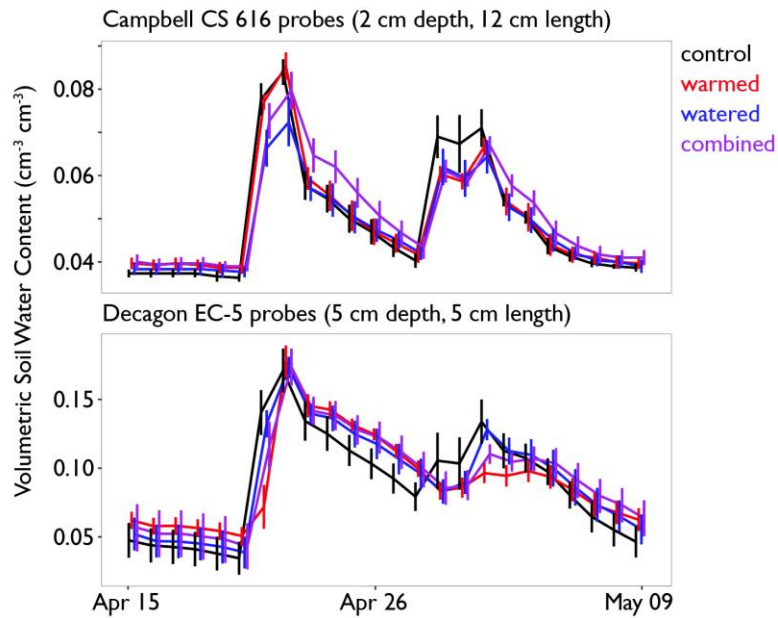

Fig S3. Daily maximum moisture values during a 2010 rain event, from April 15-May 9 in two sets of buried moisture probes (a) Campbell CS616 probes that were shortened to 12 cm and buried 2 cm below the surface ( $n = 3$ ; probes were in 3 of 5 blocks) and (b) Decagon EC-5 probes buried 5 cm below the surface ( $n = 5$ , all five blocks were monitored). All values are mean  $\pm$  SE.

Although there is variation among the probes, moisture data from multiple sets of buried probes indicated no evidence of a drying effect in the warmed plots (Figure S1). While the physical properties of the system dictate that at least some increased evaporative pressure would be applied to soil water due to warmer soil temperatures, the time series we show above is representative of what we observed during dozens of rain events over the nine-year period of the study. During these events, there is some uncertainty driven by probe to probe variability, but the rate of decline in soil moisture among treatments were similar.
